# Supplementary material for: Modulating photophysical properties in a flexible porous host by regulating guest-assisted charge transfer interactions
Source: Royal Society of Chemistry journal article supplement (doi:10.1039/d4cc03630a), 2024-01-01
Supplement: d4cc03630a1.pdf [file d4cc03630a1.pdf]

## **Supporting Information**

### Modulating Photophysical Properties in a Flexible Porous Host by Regulating Guest-Assisted Charge Transfer Interactions

*Rohan Jena<sup>a</sup>, Faruk Ahamed Rahimi<sup>a</sup>, Tarak Nath Das<sup>b</sup>, Soumya Kanti Mondal<sup>a</sup>, Jatin Chauhan<sup>a</sup> and Tapas Kumar Maji<sup>a,b\*</sup>*

*<sup>a</sup>Molecular Materials Laboratory, Chemistry and Physics of Materials Unit, School of Advanced Materials (SAMat), Jawaharlal Nehru Centre for Advanced Scientific Research, Jakkur Post, Bangalore- 560064.*

*<sup>b</sup>New Chemistry Unit, Jawaharlal Nehru Centre for Advanced Scientific Research, Jakkur Post, Bangalore- 560064.*

*Email: [tmaji@jncasr.ac.in](mailto:tmaji@jncasr.ac.in)*

## Materials

All the reagents employed were commercially available and used as provided without further purification. Zinc nitrate hexahydrate ( $\text{Zn}(\text{NO}_3)_2 \cdot 6\text{H}_2\text{O}$ ) 2,6-naphthalene dicarboxylic acid ( $\text{H}_2\text{ndc}$ ), 1,10-phenanthroline (o-phen), N,N-dimethylformamide (DMF), fluorene, carbazole, dibenzofuran and dibenzothiophene were purchased from Sigma Aldrich chemicals.

**Synthesis of PCP (1):** Synthesis of **1** was carried out according to the previously reported methodology.  $\text{H}_2\text{ndc}$  (0.022 g, 0.1 mmol) and o-phen (0.020 g, 0.1 mmol) were dissolved in 5 mL of DMF and mixed well, followed by the addition of  $\text{Zn}(\text{NO}_3)_2 \cdot 6\text{H}_2\text{O}$  (0.030 g, 0.1 mmol). The mixture was sonicated and kept in a glass vial at 120 °C for 36 h. The resulting compound was washed with DMF and dried at room temperature overnight. A single crystalline pale-yellow colored product was obtained with a yield of approximately 80%.

**Synthesis of 1-FLU:**  $\text{H}_2\text{ndc}$  (0.022 g, 0.1 mmol) and o-phen (0.020 g, 0.1 mmol) were dissolved in 5 mL of DMF and mixed well, followed by the addition of  $\text{Zn}(\text{NO}_3)_2 \cdot 6\text{H}_2\text{O}$  (0.030 g, 0.1 mmol). 0.5 g of aromatic guest (fluorene) was added to this clear solution and at 120 °C for 36 h. The resulting compound was washed with DMF and dried at room temperature overnight. A single crystalline yellow colored product was obtained with a yield of approximately 75%. Good quality crystals were chosen under optical microscope for single-crystal X-ray diffraction measurement.

**Synthesis of 1-CBZ, 1-DBF, and 1-DBT:** Similar procedure as **1-FLU** was followed except for the type of aromatic guests, i.e., 0.5 g of carbazole or dibenzofuran or dibenzothiophene was used for the synthesis of **1-CBZ** or **1-DBF** or **1-DBT** respectively.

## Physical Measurements

**Single crystal X-ray diffraction (SCXRD):** Suitable single crystals of **1-FLU**, **1-CBZ**, **1-DBF**, and **1-DBT** were mounted on a thin glass fibre. X-ray crystallographic data of such crystals were collected on a Bruker Smart-CCD diffractometer equipped with a normal focus, 2.4 kW sealed tube X-ray source with graphite monochromated Mo- $\text{K}\alpha$  radiation. The program SAINT was used for integration of diffraction profiles, and absorption correction was made with SADABS3 program. Structures were solved by SIR 92 and refined by the full-matrix least-squares method using SHELXL-97. All hydrogen atoms were fixed in ideal positions by HFIX command. In addition, nonhydrogen atoms were refined anisotropically. All crystallographic and structure refinement data are summarized in Table S1-S4. All calculations were carried out using SHELXL-97, PLATON, SHELXS-97 and X-Seed Ver 4. The crystal structures can be obtained from Cambridge crystallographic database centre via CCDC numbers 2366677, 2366678, 2366679 and 2366680. **Powder X-ray diffraction (PXRD):** PXRD measurements were performed on a Bruker D8 discover instrument using Cu- $\text{K}\alpha$  radiation. **Nuclear magnetic resonance (NMR):**  $^1\text{H}$ -NMR spectra were recorded on a Bruker UltraShield Plus 400 (at 400 MHz) with chemical shifts recorded as ppm and all spectra were calibrated against tetramethyl silane (TMS).

**Photophysical Measurements:** UV-visible absorption spectra were recorded using Perkin Elmer Model Lambda 900 spectrophotometer. Photoluminescence (PL), temperature dependent PL and excited-state lifetime studies were performed using Edinburgh FLS 1000 instrument.

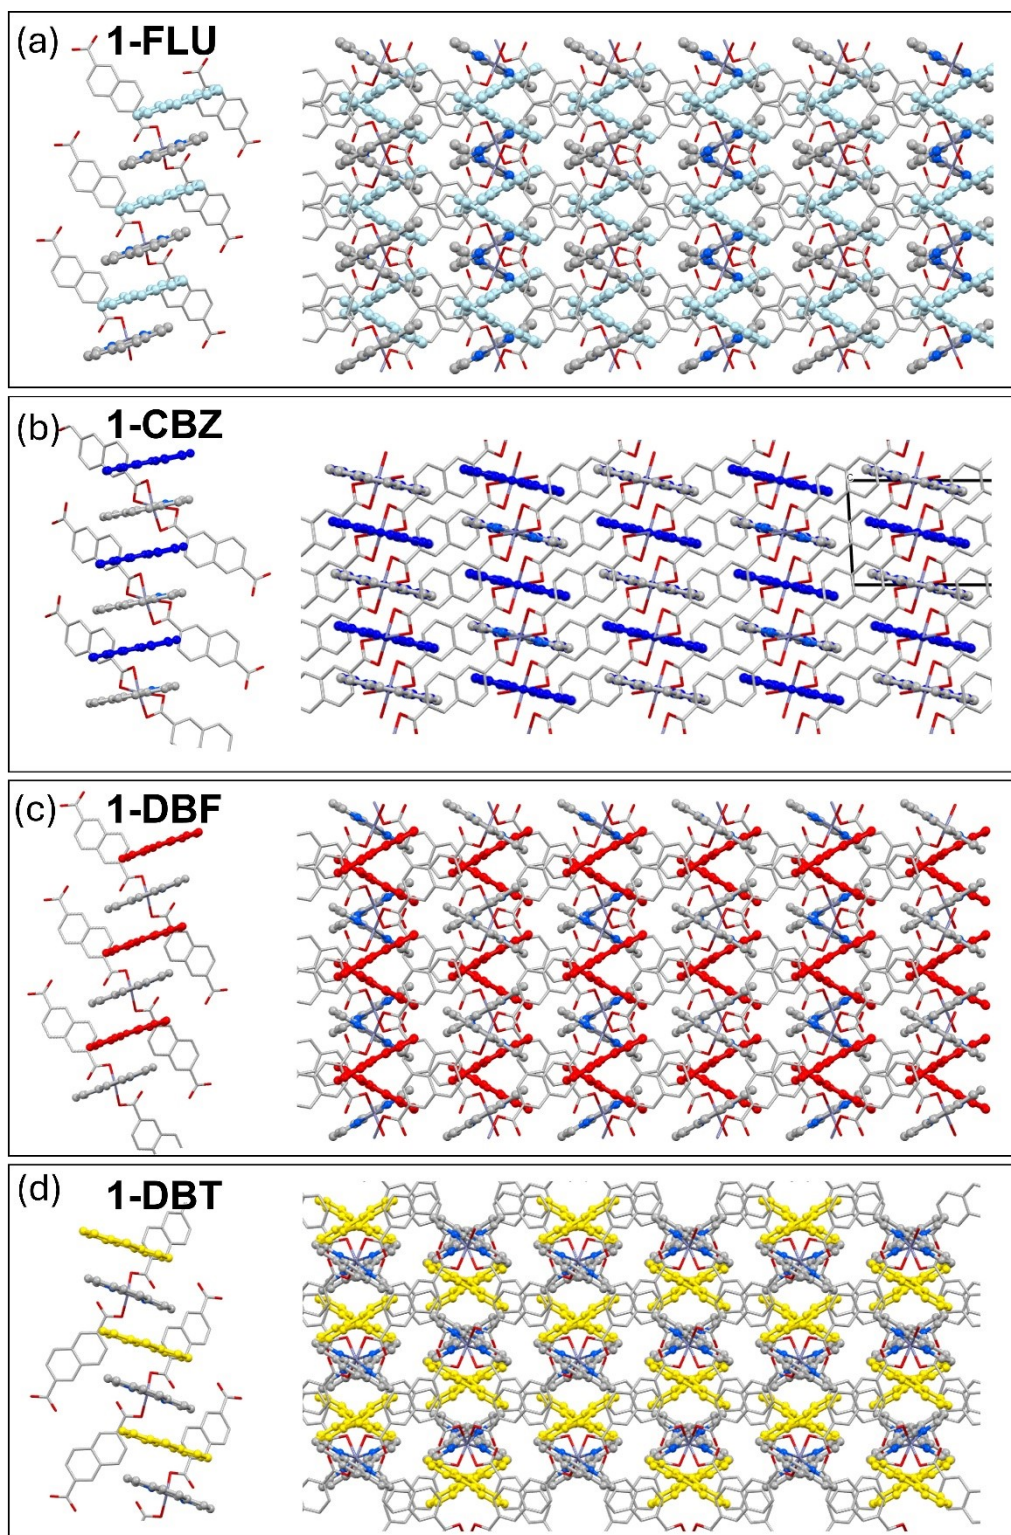

**Figure S1:** Extended structures of (a) 1-FLU, (b) 1-CBZ, (c) 1-DBF and (d) 1-DBT showing long range ordered donor-acceptor (D-A) arrangement. For visual representation the donor guest molecules are shown in different colours; fluorene (cyan), carbazole (blue), dibenzofuran (red) and dibenzothiophene (yellow.)

**Table S1:** Crystallographic parameters for **1-FLU**

|                                                 |                                                                                                    |
|-------------------------------------------------|----------------------------------------------------------------------------------------------------|
| <b>Empirical formula</b>                        | <b>C<sub>24</sub> H<sub>14</sub> N<sub>2</sub> O<sub>4</sub> Zn, C<sub>13</sub> H<sub>10</sub></b> |
| <b>Formula weight</b>                           | 625.97                                                                                             |
| <b>Crystal system</b>                           | orthorhombic                                                                                       |
| <b>Space group</b>                              | Pca21                                                                                              |
| <b><i>a</i> (Å)</b>                             | 19.745(2)                                                                                          |
| <b><i>b</i> (Å)</b>                             | 7.9099(9)                                                                                          |
| <b><i>c</i> (Å)</b>                             | 17.683(2)                                                                                          |
| <b><i>α</i> (deg)</b>                           | 90                                                                                                 |
| <b><i>β</i> (deg)</b>                           | 90                                                                                                 |
| <b><i>γ</i> (deg)</b>                           | 90                                                                                                 |
| <b><i>V</i> (Å<sup>3</sup>)</b>                 | 2761.8(5)                                                                                          |
| <b><i>Z</i></b>                                 | 4                                                                                                  |
| <b><i>T</i> (K)</b>                             | 298                                                                                                |
| <b><i>D<sub>c</sub></i> (g cm<sup>-3</sup>)</b> | 1.505                                                                                              |
| <b><i>μ</i> (mm<sup>-1</sup>)</b>               | 0.937                                                                                              |
| <b><i>F</i> (000)</b>                           | 1288                                                                                               |
| <b><i>θ<sub>max</sub></i> (deg)</b>             | 26.0                                                                                               |
| <b><i>λ</i> (Mo Kα)</b>                         | 0.71073                                                                                            |
| <b>Total data</b>                               | 162932                                                                                             |
| <b>Unique data, <i>R<sub>int</sub></i></b>      | 5418, 0.111                                                                                        |
| <b>Data [<i>I</i> &gt; 2σ(<i>I</i>)]</b>        | 4777                                                                                               |
| <b><i>R<sup>a</sup></i></b>                     | 0.0348                                                                                             |
| <b><i>R<sub>w</sub><sup>b</sup></i></b>         | 0.0927                                                                                             |
| <b>GOF</b>                                      | 1.05                                                                                               |

$$^aR = \frac{\sum ||F_o| - |F_c||}{\sum |F_o|}, \quad ^bR_w = \left[ \frac{\sum \{w(F_o^2 - F_c^2)^2\}}{\sum \{w(F_o^2)\}} \right]^{1/2}.$$

**Table S2:** Crystallographic parameters for **1-CBZ**

|                                                 |                                                                                                     |
|-------------------------------------------------|-----------------------------------------------------------------------------------------------------|
| <b>Empirical formula</b>                        | <b>C<sub>24</sub> H<sub>14</sub> N<sub>2</sub> O<sub>4</sub> Zn, C<sub>12</sub> H<sub>9</sub> N</b> |
| <b>Formula weight</b>                           | 626.96                                                                                              |
| <b>Crystal system</b>                           | monoclinic                                                                                          |
| <b>Space group</b>                              | C2/c                                                                                                |
| <b><i>a</i> (Å)</b>                             | 7.2655(2)                                                                                           |
| <b><i>b</i> (Å)</b>                             | 20.2802(6)                                                                                          |
| <b><i>c</i> (Å)</b>                             | 18.6210(6)                                                                                          |
| <b><i>α</i> (deg)</b>                           | 90                                                                                                  |
| <b><i>β</i> (deg)</b>                           | 93.122(1)                                                                                           |
| <b><i>γ</i> (deg)</b>                           | 90                                                                                                  |
| <b><i>V</i> (Å<sup>3</sup>)</b>                 | 2739.65(14)                                                                                         |
| <b><i>Z</i></b>                                 | 4                                                                                                   |
| <b><i>T</i> (K)</b>                             | 298                                                                                                 |
| <b><i>D<sub>c</sub></i> (g cm<sup>-3</sup>)</b> | 1.520                                                                                               |
| <b><i>μ</i> (mm<sup>-1</sup>)</b>               | 0.946                                                                                               |
| <b><i>F</i> (000)</b>                           | 1288                                                                                                |
| <b><i>θ<sub>max</sub></i> (deg)</b>             | 26.0                                                                                                |
| <b><i>λ</i> (Mo Kα)</b>                         | 0.71073                                                                                             |
| <b>Total data</b>                               | 24638                                                                                               |
| <b>Unique data, <i>R<sub>int</sub></i></b>      | 2691, 0.044                                                                                         |
| <b>Data [<i>I</i> &gt; 2σ(<i>I</i>)]</b>        | 2431                                                                                                |
| <b><i>R<sup>a</sup></i></b>                     | 0.0583                                                                                              |
| <b><i>R<sub>w</sub><sup>b</sup></i></b>         | 0.1778                                                                                              |
| <b>GOF</b>                                      | 1.08                                                                                                |

$${}^aR = \frac{\sum ||F_o| - |F_c||}{\sum |F_o|}, \quad {}^bR_w = \left[ \frac{\sum \{w(F_o^2 - F_c^2)^2\}}{\sum \{w(F_o^2)^2\}} \right]^{1/2}.$$

**Table S3:** Crystallographic parameters for **1-DBF**

|                                                 |                                                                                                     |
|-------------------------------------------------|-----------------------------------------------------------------------------------------------------|
| <b>Empirical formula</b>                        | <b>C<sub>24</sub> H<sub>14</sub> N<sub>2</sub> O<sub>4</sub> Zn, C<sub>12</sub> H<sub>8</sub> O</b> |
| <b>Formula weight</b>                           | 627.95                                                                                              |
| <b>Crystal system</b>                           | orthorhombic                                                                                        |
| <b>Space group</b>                              | Pca21                                                                                               |
| <b><i>a</i> (Å)</b>                             | 19.7165(5)                                                                                          |
| <b><i>b</i> (Å)</b>                             | 7.9538(2)                                                                                           |
| <b><i>c</i> (Å)</b>                             | 17.5159(4)                                                                                          |
| <b><i>α</i> (deg)</b>                           | 90                                                                                                  |
| <b><i>β</i> (deg)</b>                           | 90                                                                                                  |
| <b><i>γ</i> (deg)</b>                           | 90                                                                                                  |
| <b><i>V</i> (Å<sup>3</sup>)</b>                 | 2746.86(12)                                                                                         |
| <b><i>Z</i></b>                                 | 4                                                                                                   |
| <b><i>T</i> (K)</b>                             | 298                                                                                                 |
| <b><i>D<sub>c</sub></i> (g cm<sup>-3</sup>)</b> | 1.518                                                                                               |
| <b><i>μ</i> (mm<sup>-1</sup>)</b>               | 0.945                                                                                               |
| <b><i>F</i> (000)</b>                           | 1288                                                                                                |
| <b><i>θ<sub>max</sub></i> (deg)</b>             | 26.0                                                                                                |
| <b><i>λ</i> (Mo Kα)</b>                         | 0.71073                                                                                             |
| <b>Total data</b>                               | 110005                                                                                              |
| <b>Unique data, <i>R<sub>int</sub></i></b>      | 5389, 0.096                                                                                         |
| <b>Data [<i>I</i> &gt; 2σ(<i>I</i>)]</b>        | 4709                                                                                                |
| <b><i>R<sup>a</sup></i></b>                     | 0.0302                                                                                              |
| <b><i>R<sub>w</sub><sup>b</sup></i></b>         | 0.0770                                                                                              |
| <b>GOF</b>                                      | 1.03                                                                                                |

$${}^aR = \frac{\sum ||F_o| - |F_c||}{\sum |F_o|}, \quad {}^bR_w = \left[ \frac{\sum \{w(F_o^2 - F_c^2)^2\}}{\sum \{w(F_o^2)^2\}} \right]^{1/2}.$$

**Table S4:** Crystallographic parameters for **1-DBT**

|                                                            |                                                                                                     |
|------------------------------------------------------------|-----------------------------------------------------------------------------------------------------|
| <b>Empirical formula</b>                                   | <b>C<sub>24</sub> H<sub>14</sub> N<sub>2</sub> O<sub>4</sub> Zn, C<sub>12</sub> H<sub>8</sub> S</b> |
| <b>Formula weight</b>                                      | 644.01                                                                                              |
| <b>Crystal system</b>                                      | monoclinic                                                                                          |
| <b>Space group</b>                                         | P21/c                                                                                               |
| <b><i>a</i> (Å)</b>                                        | 7.9306(3)                                                                                           |
| <b><i>b</i> (Å)</b>                                        | 17.5614(8)                                                                                          |
| <b><i>c</i> (Å)</b>                                        | 20.1609(9)                                                                                          |
| <b><math>\alpha</math> (deg)</b>                           | 90                                                                                                  |
| <b><math>\beta</math> (deg)</b>                            | 100.522(2)                                                                                          |
| <b><math>\gamma</math> (deg)</b>                           | 90                                                                                                  |
| <b><i>V</i> (Å<sup>3</sup>)</b>                            | 2760.6(2)                                                                                           |
| <b><i>Z</i></b>                                            | 4                                                                                                   |
| <b><i>T</i> (K)</b>                                        | 298                                                                                                 |
| <b><i>D<sub>c</sub></i> (g cm<sup>-3</sup>)</b>            | 1.549                                                                                               |
| <b><math>\mu</math> (mm<sup>-1</sup>)</b>                  | 1.013                                                                                               |
| <b><i>F</i> (000)</b>                                      | 1320                                                                                                |
| <b><math>\theta_{max}</math> (deg)</b>                     | 26.0                                                                                                |
| <b><math>\lambda</math> (Mo K<math>\alpha</math>)</b>      | 0.71073                                                                                             |
| <b>Total data</b>                                          | 64519                                                                                               |
| <b>Unique data, <i>R</i><sub>int</sub></b>                 | 5426, 0.213                                                                                         |
| <b>Data [<i>I</i> &gt; 2<math>\sigma</math>(<i>I</i>)]</b> | 2969                                                                                                |
| <b><i>R</i><sup>a</sup></b>                                | 0.0592                                                                                              |
| <b><i>R</i><sub>w</sub><sup>b</sup></b>                    | 0.1613                                                                                              |
| <b>GOF</b>                                                 | 1.01                                                                                                |

$${}^a R = \frac{\sum \|F_o\| - |F_c|}{\sum |F_o|}, \quad {}^b R_w = \left[ \frac{\sum \{w(F_o^2 - F_c^2)\}^2}{\sum \{w(F_o^2)\}^2} \right]^{1/2}.$$

## PXRD Patterns

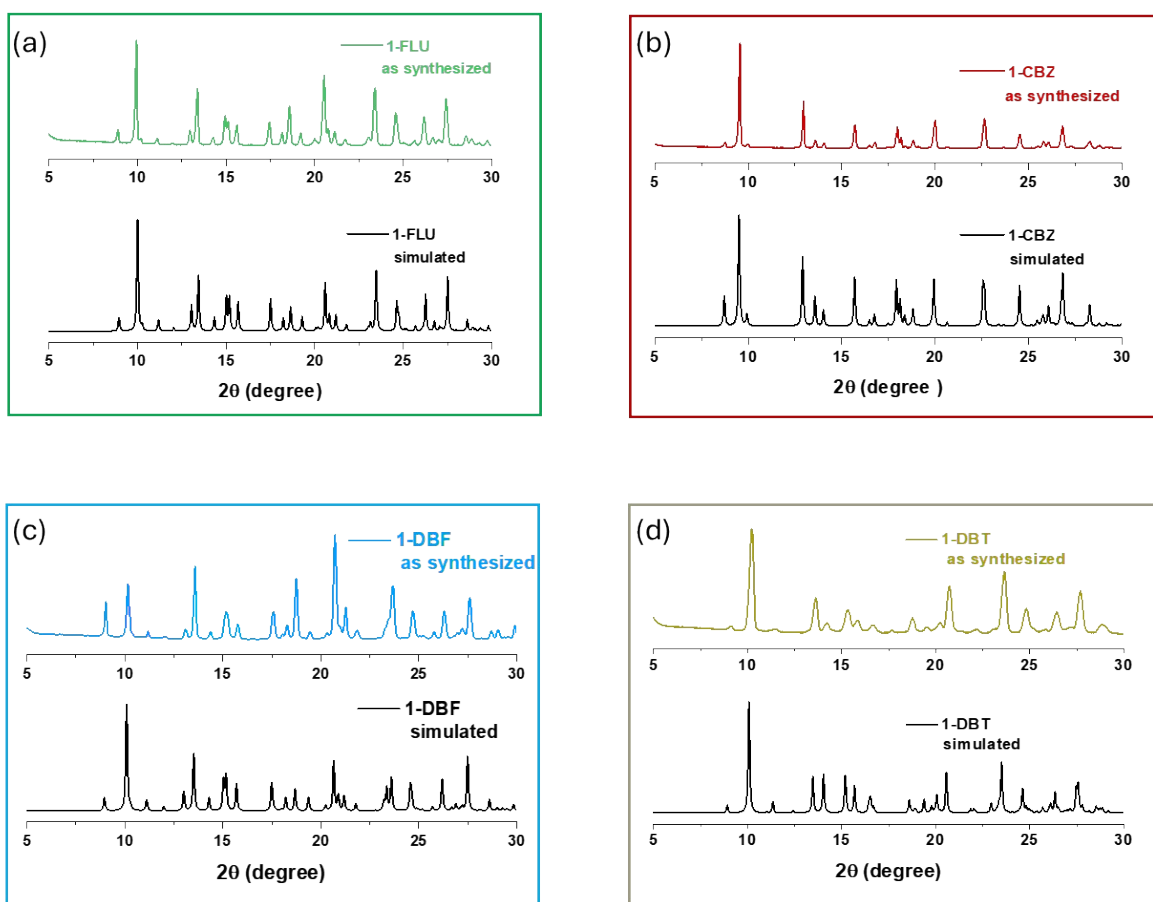

**Figure S2:** Comparison of as synthesized and simulated PXRD patterns for (a) 1-FLU (b) 1-CBZ (c) 1-DBF and (d) 1-DBT.

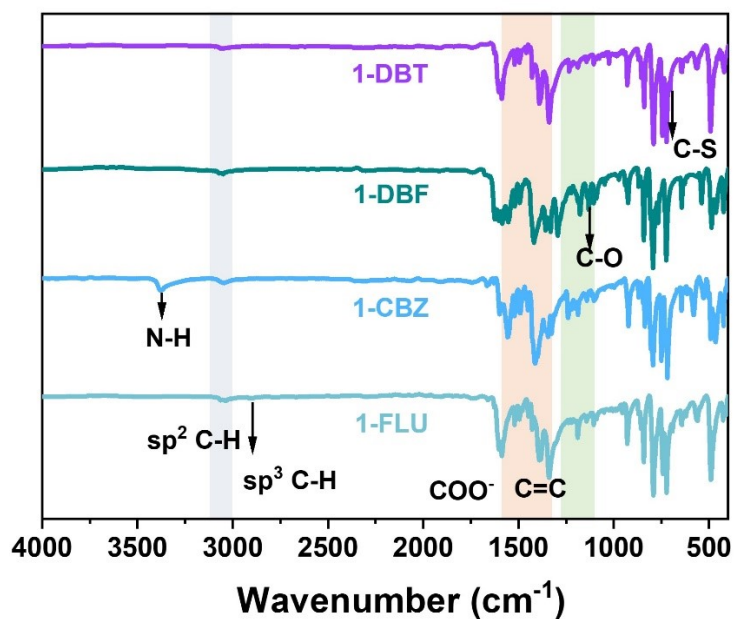

**Figure S3:** FTIR spectra for 1-FLU, 1-CBZ, 1-DBF and 1-DBT.



## NMR Analyses

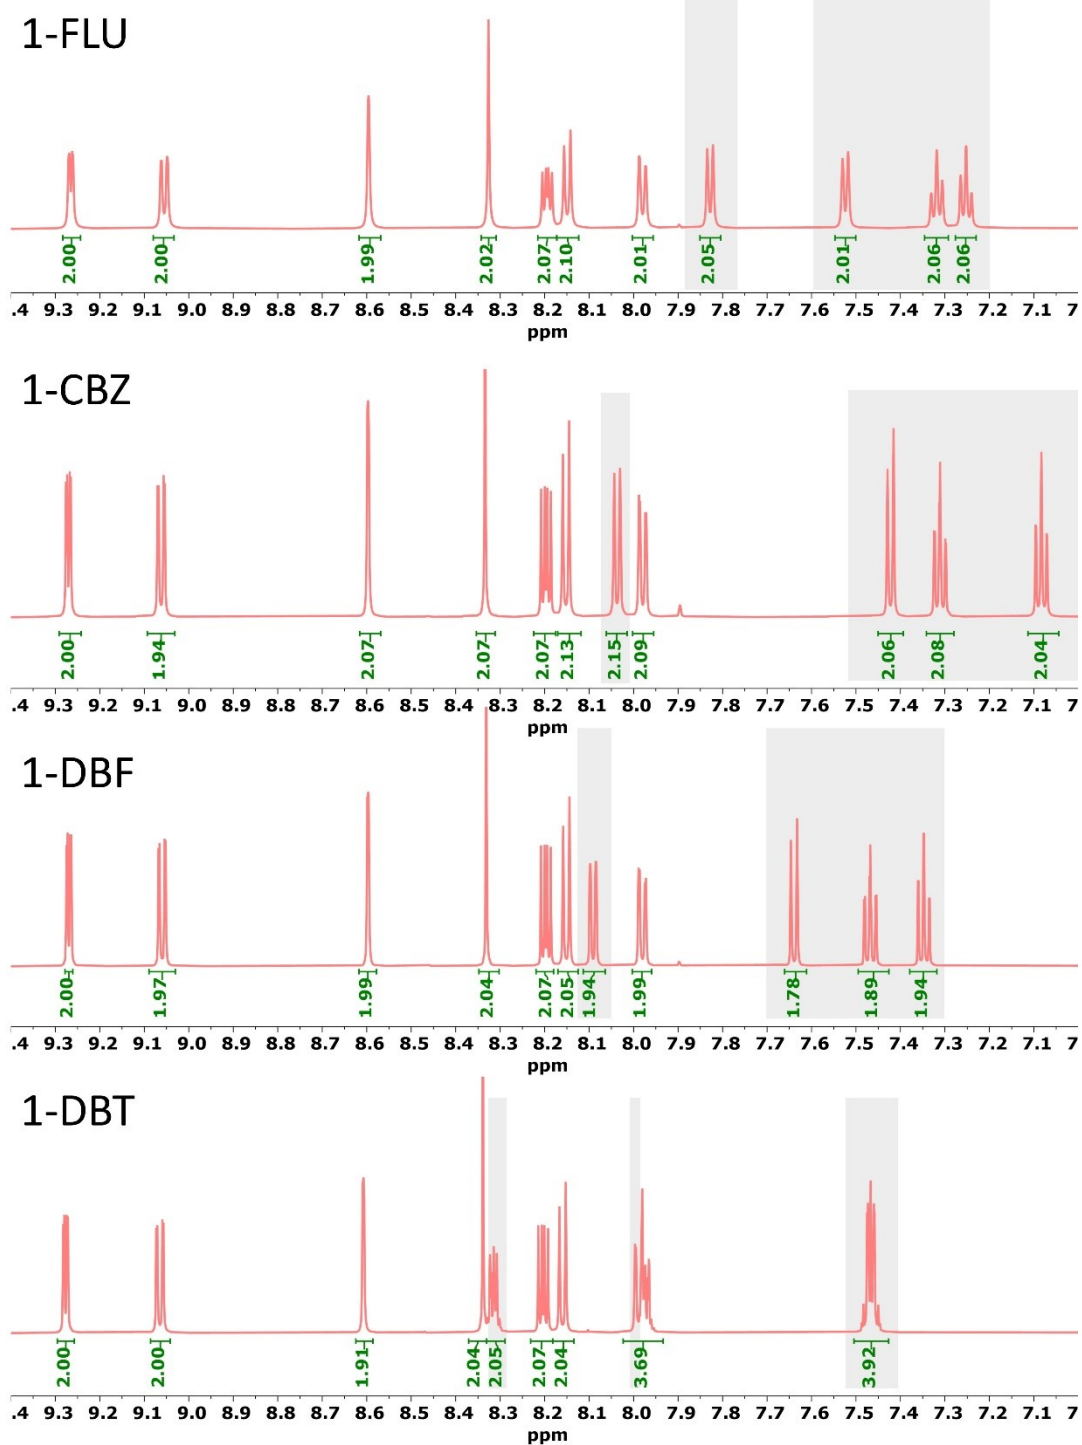

**Figure S4:** NMR spectra for digested crystals of **1-FLU**, **1-CBZ**, **1-DBF** and **1-DBT** in dil. HCl. and DMSO-d<sub>6</sub>. (Note: Grey shaded areas represent peaks for respective guest molecules within the PCPs.)

## TDDFT Analyses

**Table S5:** TDDFT analysis for **1-FLU**, **1-CBZ**, **1-DBF**, **1-DBT** to assess the CT bands using 6-311++G\*\* basis set.

| Compound Name | Theoretical wavelength (nm) | Oscillator strength | Transition                                   | Expt. Absorption maximum (nm) |
|---------------|-----------------------------|---------------------|----------------------------------------------|-------------------------------|
| <b>1-FLU</b>  | 421.64                      | 0.0060              | HOMO-2 to LUMO (92%)                         | 425                           |
| <b>1-CBZ</b>  | 403.37                      | 0.0138              | HOMO-3 to LUMO (95%)                         | 415                           |
| <b>1-DBF</b>  | 378.71                      | 0.0051              | HOMO-4 to LUMO (12%)<br>HOMO-6 to LUMO (86%) | 400                           |
| <b>1-DBT</b>  | 421.97                      | 0.0005              | HOMO-2 to LUMO (84%)                         | 420                           |

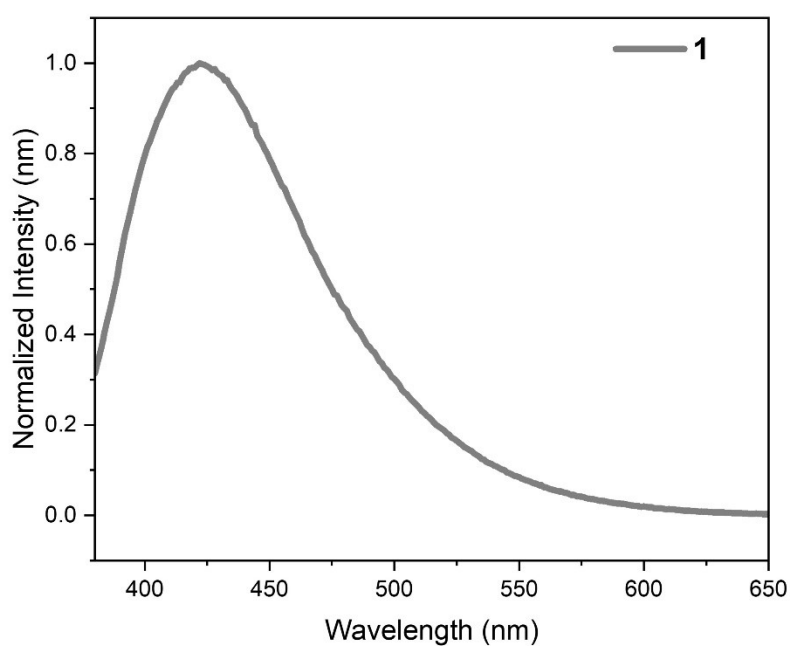

**Figure S5:** PL spectrum for **1**, excited at 370 nm.

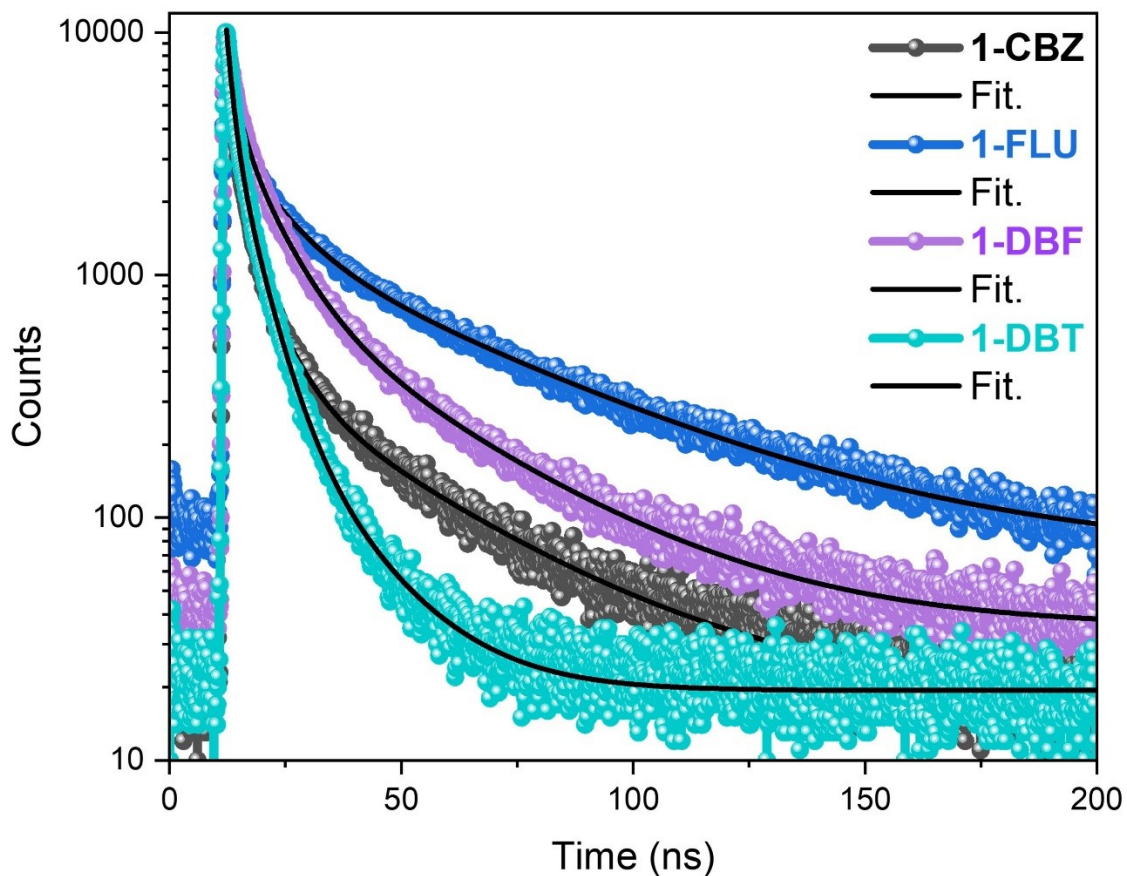

**Figure S6:** TCSPC (Lifetime measurements) for **1-FLU**, **1-CBZ**, **1-DBF** and **1-DBT** ( $\lambda_{\text{Ex}}=405$  nm).

**Table S6:** PL Lifetimes fitting parameters and average lifetimes for **1-FLU**, **1-CBZ**, **1-DBF** and **1-DBT**, corresponding to Figure S6.

| <b>Compound Name</b> | <b>t<sub>1</sub> (ns)</b> | <b>t<sub>2</sub> (ns)</b> | <b>t<sub>3</sub> (ns)</b> | <b>B<sub>1</sub> (%)</b> | <b>B<sub>2</sub> (%)</b> | <b>B<sub>3</sub> (%)</b> | <b>T<sub>avg</sub> (ns)</b> |
|----------------------|---------------------------|---------------------------|---------------------------|--------------------------|--------------------------|--------------------------|-----------------------------|
| <b>1-FLU</b>         | 1.476                     | 9.054                     | 46.14                     | 8.67                     | 23.49                    | 46.14                    | <b>23.54</b>                |
| <b>1-CBZ</b>         | 1.524                     | 6.03                      | 33                        | 30.81                    | 34.34                    | 34.86                    | <b>14.04</b>                |
| <b>1-DBF</b>         | 1.923                     | 7.922                     | 32.5                      | 13.51                    | 44.37                    | 42.11                    | <b>17.46</b>                |
| <b>1-DBT</b>         | 1.303                     | 4.815                     | 14.91                     | 24.12                    | 56.8                     | 19.07                    | <b>5.89</b>                 |

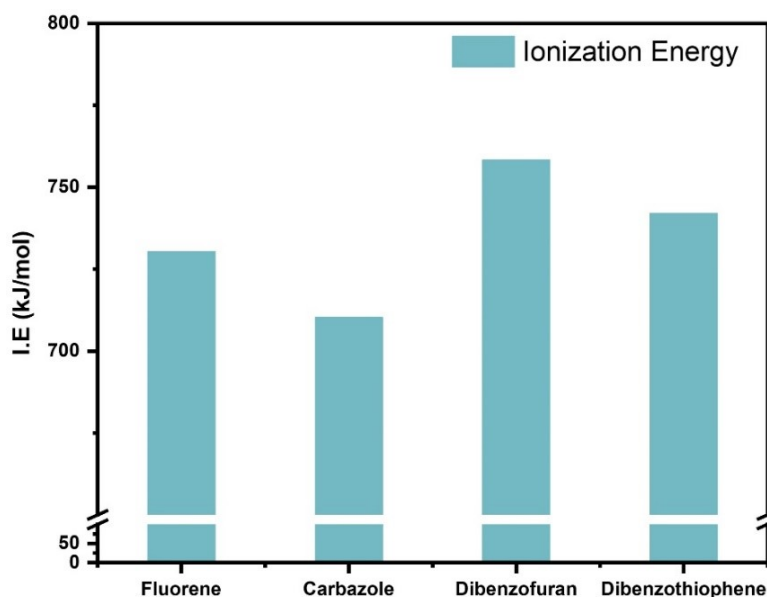

**Figure S7:** First ionization energy for individual guest molecules.

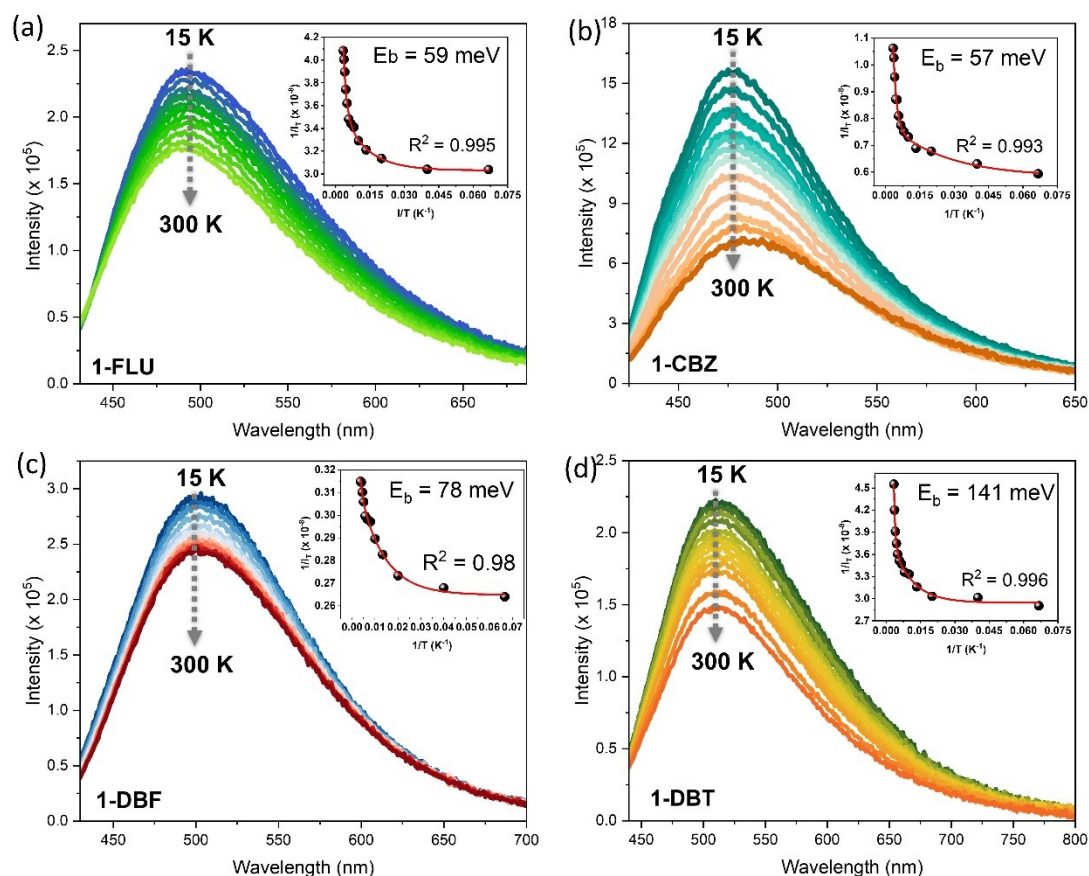

**Figure S8:** Temperature dependent PL spectra for (a) 1-FLU (b) 1-CBZ (c) 1-DBF and (d) 1-DBT showing respective exciton binding energy values obtained from exponential fitting of  $1/I_T$  vs  $1/T$ . Fitting curves are represented in the insets.

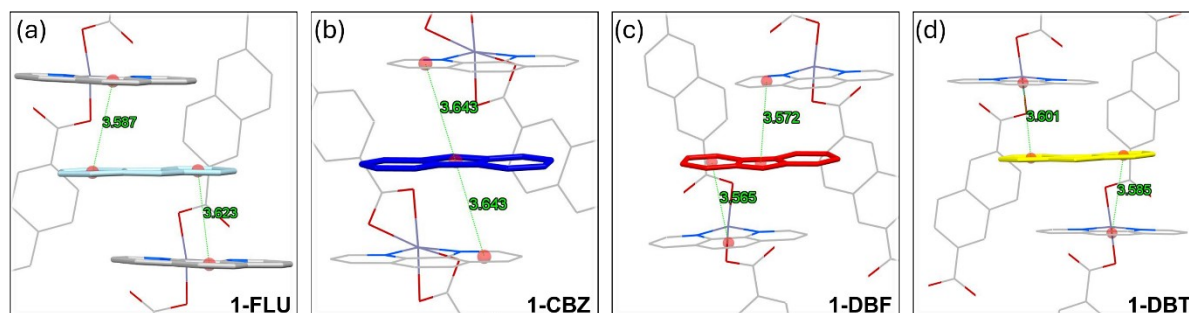

**Figure S9:** Guest stacking between o-phen units for (a) 1-FLU, (b) 1-CBZ, (c) 1-DBF and (d) 1-DBT. The corresponding centroid-to-centroid distances for each of the host-guest system were measured in Mercury (CCDC) and mentioned alongside each figure.

### Computational Details

All the calculations were performed using density functional theory (DFT) in Gaussian16 program package.<sup>1</sup> The calculations were performed using B3LYP exchange-correlation functional along with 6-311++G\*\* (single point energy and TDDFT calculations) or 6-31+G\*\* basis set (optimization and frequency calculations) for all atoms except for Zn atom, for which LANL2DZ, which utilized a widely used effective core potential (ECP)-type basis set, was used.<sup>2-10</sup> The calculations were performed in the absence of any solvent. Grimme's d3 dispersion was also used to tackle weak interactions.<sup>11-13</sup> Single point energy calculations were performed to get molecular orbital diagrams. Time-dependent density functional theory (TDDFT) calculations were performed to assign the electronic absorption spectra. The pictures of the molecular orbitals were taken from Gauss View 6.0.16.<sup>14</sup>

### Cartesian coordinates of the computed structures

Coordinates are given in standard XYZ format

**Table S7:** Geometry of 1-FLU (Fluorene) (singlet) for single point calculation, directly obtained from single crystal X-ray Crystallographic structure, computed at the B3LYP-D3/ 6-311++G\*\* (HCNO)/ LANL2DZ (Zn) level in the absence of any solvent.

| Atom | x           | y           | z           |
|------|-------------|-------------|-------------|
| Zn   | 0.52719900  | 0.01373100  | -0.57027100 |
| O    | 2.23647900  | -0.79849500 | -1.03915800 |
| O    | 11.13124600 | -3.12390000 | -0.70866100 |
| N    | 0.73109600  | 1.89522200  | 0.33123100  |
| N    | -0.00002400 | 1.24703200  | -2.17070100 |

|   |             |             |             |
|---|-------------|-------------|-------------|
| O | 11.36665400 | -2.85049100 | 1.47159200  |
| O | 2.38542200  | -0.82438900 | 1.16258500  |
| C | 8.63513800  | -2.35781100 | 1.84501600  |
| H | 9.16033300  | -2.51281300 | 2.59737600  |
| C | 6.51150200  | -1.79474200 | 0.87766900  |
| C | 7.07915300  | -1.85617700 | -0.42161900 |
| C | 9.22352700  | -2.44991000 | 0.55830600  |
| C | 0.42027500  | 2.91365100  | -0.50802800 |
| C | 7.32974600  | -2.04868000 | 2.00275700  |
| H | 6.96661500  | -2.00249800 | 2.85811600  |
| C | 4.35256500  | -1.29201800 | -0.10920700 |
| C | 8.45858400  | -2.20314400 | -0.53977700 |
| H | 8.84181000  | -2.26189900 | -1.38498600 |
| C | 0.02934000  | 2.57096400  | -1.84991100 |
| C | 5.12401600  | -1.49605500 | 0.99024700  |
| H | 4.73777800  | -1.43916600 | 1.83415300  |
| C | 2.88986600  | -0.96319800 | 0.03643900  |
| C | -0.33888200 | 0.93672800  | -3.40641800 |
| H | -0.36891800 | 0.03760700  | -3.64460700 |
| C | 0.47385400  | 4.26148500  | -0.11222900 |
| C | 10.67506100 | -2.83671000 | 0.38745300  |
| C | 4.93180200  | -1.36025500 | -1.40194100 |
| H | 4.40195800  | -1.22701300 | -2.15545400 |
| C | -0.29890500 | 3.59120300  | -2.75261000 |
| C | -0.63665900 | 3.20017200  | -4.04400200 |
| H | -0.84989100 | 3.84154100  | -4.68162100 |
| C | 6.27881400  | -1.62398100 | -1.54572000 |
| H | 6.65629600  | -1.64863900 | -2.39511600 |
| C | -0.65456000 | 1.89216700  | -4.37340900 |
| H | -0.87674100 | 1.62835600  | -5.23760200 |
| C | 1.18473300  | 3.50145200  | 2.02224900  |
| H | 1.44850000  | 3.67464800  | 2.89748700  |
| C | -0.21960900 | 4.95935600  | -2.29571700 |
| H | -0.42318200 | 5.64583000  | -2.88841000 |
| C | 0.13662700  | 5.26543900  | -1.04716100 |
| H | 0.16420400  | 6.15701500  | -0.78716000 |
| C | 0.88523900  | 4.51351200  | 1.20348700  |
| H | 0.95086100  | 5.39006700  | 1.50847200  |
| C | 1.10252200  | 2.18514600  | 1.56758700  |
| H | 1.31466900  | 1.49294000  | 2.15024700  |
| O | -0.95417100 | -0.84582600 | 0.36038200  |
| O | -8.89947100 | -6.36911600 | -0.12964400 |
| O | -1.09107400 | -1.74901200 | -1.65187600 |
| O | -8.93226700 | -5.23309400 | 1.76215500  |
| C | -3.45146700 | -1.85058600 | 1.13325100  |
| H | -3.05128800 | -1.20632900 | 1.67240800  |
| C | -5.24581600 | -3.39276100 | 0.72748300  |
| C | -4.62209800 | -3.81264900 | -0.47618700 |
| C | -2.81765100 | -2.23311600 | -0.07598500 |
| C | -4.62231100 | -2.40166700 | 1.52045600  |
| H | -5.02118600 | -2.12696100 | 2.31485500  |
| C | -7.08963100 | -4.90471300 | 0.27802600  |
| C | -3.39434000 | -3.18992000 | -0.85301300 |
| H | -2.98063000 | -3.44356900 | -1.64623400 |
| C | -6.49462900 | -3.98065300 | 1.07655800  |
| H | -6.91165000 | -3.72695900 | 1.86796500  |
| C | -8.40421300 | -5.52285100 | 0.67627400  |
| C | -1.52837000 | -1.58258000 | -0.52355000 |
| C | -6.45728500 | -5.31248700 | -0.92413600 |
| H | -6.86803200 | -5.94067100 | -1.47453800 |

|   |             |             |             |
|---|-------------|-------------|-------------|
| C | -5.23478000 | -4.78020200 | -1.28025300 |
| H | -4.81650300 | -5.06567500 | -2.06007600 |
| C | -2.42735300 | 3.28567300  | 1.85906600  |
| C | -2.87230400 | 3.03039900  | 0.49670900  |
| C | -2.42222400 | 4.66014600  | 2.08884100  |
| C | -2.85994600 | 5.38266200  | 0.84721500  |
| H | -2.15770100 | 5.96364500  | 0.51255800  |
| H | -3.65711200 | 5.91120000  | 1.01033000  |
| C | -3.13857400 | 4.25423200  | -0.11307800 |
| C | -2.06061800 | 2.39024600  | 2.85864200  |
| H | -2.07042900 | 1.47311800  | 2.70746600  |
| C | -1.66889300 | 4.26033500  | 4.31670900  |
| H | -1.40159400 | 4.58321000  | 5.14709800  |
| C | -2.05366200 | 5.15822100  | 3.31377700  |
| H | -2.06017400 | 6.07512200  | 3.47445600  |
| C | -3.59727700 | 4.31815700  | -1.41733400 |
| H | -3.75956400 | 5.13663400  | -1.82622400 |
| C | -3.07143000 | 1.84380900  | -0.20870300 |
| H | -2.88389500 | 1.01870900  | 0.17860600  |
| C | -1.68227700 | 2.90399200  | 4.08243900  |
| H | -1.42985800 | 2.32153400  | 4.76292600  |
| C | -3.55528700 | 1.92922100  | -1.50319800 |
| H | -3.71243600 | 1.14670900  | -1.97996700 |
| C | -3.80867600 | 3.13007200  | -2.09800400 |
| H | -4.12758600 | 3.15148600  | -2.97142100 |
| H | -9.75837752 | -5.71331542 | 1.85449966  |
| H | 12.06233267 | -3.34066634 | -0.62096686 |

-----

Total electronic Energy = -2663.128687 (Hartree/Particle).

**Table S8:** Geometry of **1-CBZ (Carbazole)** (singlet) for single point calculation, directly obtained from single crystal X-ray Crystallographic structure, computed at the B3LYP-D3/ 6-311++G\*\* (HCNO)/ LANL2DZ (Zn) level in the absence of any solvent.

| Atom | x           | y           | z           |
|------|-------------|-------------|-------------|
| Zn   | 0.42000200  | 0.00901200  | 0.61682000  |
| O    | -1.15561700 | -0.44111400 | -0.68437100 |
| O    | -0.89883500 | -1.74967300 | 1.05196800  |
| N    | 0.98603300  | 1.95419800  | 0.02044800  |
| C    | -4.51074700 | -3.76386700 | 0.23633300  |
| C    | -3.28501800 | -3.10598500 | 0.50066700  |
| H    | -2.77310000 | -3.37387300 | 1.22981400  |
| C    | -2.83649500 | -2.08405000 | -0.29355300 |
| C    | -4.78355400 | -2.28757700 | -1.69996300 |
| H    | -5.27784200 | -2.00680100 | -2.43609400 |
| C    | -1.54272200 | -1.39153100 | 0.04268100  |
| C    | 0.47740300  | 2.91289500  | 0.81610200  |
| C    | -3.59850000 | -1.67788700 | -1.41467300 |
| H    | -3.28907500 | -0.99104700 | -1.96026000 |
| C    | 1.80017100  | 2.31631600  | -0.96827700 |
| H    | 2.16195100  | 1.65966900  | -1.51867600 |
| C    | 0.74405200  | 4.28001000  | 0.62558100  |
| C    | 2.12538100  | 3.64920000  | -1.20210100 |
| H    | 2.70159400  | 3.87187800  | -1.89737500 |

|   |             |             |             |
|---|-------------|-------------|-------------|
| C | 1.60547700  | 4.61378300  | -0.42169900 |
| H | 1.81957400  | 5.50421900  | -0.58019800 |
| C | 0.15179000  | 5.23466600  | 1.49215500  |
| H | 0.33434800  | 6.13844000  | 1.37236600  |
| O | -8.62889300 | -6.66657900 | 0.02941600  |
| O | -8.88561600 | -5.35803400 | -1.70684300 |
| C | -5.27370500 | -3.34384000 | -0.89120700 |
| C | -6.49949200 | -4.00170800 | -1.15562100 |
| H | -7.01133000 | -3.73379400 | -1.88482300 |
| C | -6.94801500 | -5.02364300 | -0.36140100 |
| C | -5.00089800 | -4.82013000 | 1.04508900  |
| H | -4.50653000 | -5.10088000 | 1.78116500  |
| C | -8.24164900 | -5.71615000 | -0.69761000 |
| C | -6.18593000 | -5.42978000 | 0.75966500  |
| H | -6.49535500 | -6.11662100 | 1.30525100  |
| N | -0.57051000 | 1.18159300  | 2.06733500  |
| C | -0.37204500 | 2.50147300  | 1.89587500  |
| C | -1.37978000 | 0.78371000  | 3.04626200  |
| H | -1.52827100 | -0.12634000 | 3.16733500  |
| C | -0.95700900 | 3.47279700  | 2.72698900  |
| C | -2.00984500 | 1.69038800  | 3.89359200  |
| H | -2.57455000 | 1.38317700  | 4.56571000  |
| C | -1.80083200 | 3.01033700  | 3.73895500  |
| H | -2.21861900 | 3.61565800  | 4.30726400  |
| C | -0.68157600 | 4.84567900  | 2.49802200  |
| H | -1.07477200 | 5.48932600  | 3.04171100  |
| O | 2.14294300  | -0.62375700 | 1.62142300  |
| O | 2.10221500  | -0.90239800 | -0.54971500 |
| C | 6.14878400  | -2.08134900 | -0.60881000 |
| C | 4.78272700  | -1.70875100 | -0.59093800 |
| H | 4.30518000  | -1.69294700 | -1.38905800 |
| C | 4.14921500  | -1.37128000 | 0.57576200  |
| C | 6.17687400  | -1.75987000 | 1.81996700  |
| H | 6.63471500  | -1.77289300 | 2.62944600  |
| C | 2.70403300  | -0.95087800 | 0.54434000  |
| C | 4.86082100  | -1.40658000 | 1.79841500  |
| H | 4.42796200  | -1.18766200 | 2.59210300  |
| O | 10.86405700 | -3.56575500 | -1.60378600 |
| O | 10.90478600 | -3.28711300 | 0.56735100  |
| C | 6.85821700  | -2.10816200 | 0.62644700  |
| C | 8.22427300  | -2.48076000 | 0.60857400  |
| H | 8.70182000  | -2.49656400 | 1.40669500  |
| C | 8.85778500  | -2.81823100 | -0.55812500 |
| C | 6.83012600  | -2.42964200 | -1.80233100 |
| H | 6.37228500  | -2.41661900 | -2.61181000 |
| C | 10.30296800 | -3.23863400 | -0.52670300 |
| C | 8.14618000  | -2.78293200 | -1.78077800 |
| H | 8.57903800  | -3.00184900 | -2.57446600 |
| N | -1.96130900 | 2.33321200  | -1.78131500 |
| C | -1.37039900 | 3.45232200  | -2.44494300 |
| C | -0.51478800 | 5.87504500  | -3.26141100 |
| H | -0.20352200 | 6.70031200  | -3.55746100 |
| C | -1.80295300 | 4.55110200  | -1.76286800 |
| C | -0.12941100 | 4.71158100  | -3.91709400 |
| H | 0.43497100  | 4.77273900  | -4.65277800 |
| C | -0.55741200 | 3.49199000  | -3.50964400 |
| H | -0.29741000 | 2.71504900  | -3.95131100 |
| C | -1.35674600 | 5.80357200  | -2.17249600 |
| H | -1.62054500 | 6.57392100  | -1.72315900 |
| C | -2.76556100 | 2.78118200  | -0.68825500 |



|   |             |             |             |
|---|-------------|-------------|-------------|
| C | -4.13963200 | 4.16724400  | 1.17159200  |
| H | -4.62553000 | 4.62549600  | 1.81918900  |
| C | -2.66772100 | 4.14133000  | -0.69673100 |
| C | -4.17750900 | 2.77847500  | 1.12805400  |
| H | -4.68781900 | 2.32008600  | 1.75492100  |
| C | -3.48824200 | 2.07829200  | 0.19461700  |
| H | -3.51591400 | 1.14826800  | 0.16882300  |
| C | -3.38267300 | 4.86315500  | 0.25373700  |
| H | -3.35029500 | 5.79247700  | 0.26992500  |
| H | -9.48519300 | -6.06020600 | -1.96964000 |
| H | 10.44103000 | -2.74753800 | 1.21185800  |
| H | -1.83115800 | 1.37696100  | -2.04331700 |

-----

Total electronic Energy = -2679.250524 (Hartree/Particle).

**Table S9:** Geometry of **1-DBF (Dibenzofuran)** (singlet) for single point calculation, directly obtained from single crystal X-ray Crystallographic structure, computed at the B3LYP-D3/ 6-311++G\*\* (HCNO)/ LANL2DZ (Zn) level in the absence of any solvent.

| Atom | x           | y           | z           |
|------|-------------|-------------|-------------|
| O    | -8.82899000 | -6.44203000 | -0.15531700 |
| O    | -1.08231300 | -1.71809200 | -1.69995200 |
| O    | -8.86376600 | -5.31092700 | 1.74375700  |
| O    | -0.96703700 | -0.81181400 | 0.31131500  |
| C    | -4.59344200 | -3.81818300 | -0.52289400 |
| C    | -6.46739500 | -4.00174500 | 1.02970700  |
| H    | -6.88463500 | -3.75208000 | 1.82288800  |
| C    | -3.36792100 | -3.18059500 | -0.89723000 |
| H    | -2.94747900 | -3.43279400 | -1.68812800 |
| C    | -7.05492800 | -4.93124900 | 0.23708300  |
| C    | -5.22461900 | -3.39702200 | 0.67919700  |
| C    | -2.80836200 | -2.21924600 | -0.12636800 |
| C    | -3.43976200 | -1.83604700 | 1.08043900  |
| H    | -3.04215100 | -1.19009800 | 1.61717000  |
| C    | -4.61791100 | -2.39414000 | 1.46998400  |
| H    | -5.02420500 | -2.11542900 | 2.25921700  |
| C    | -6.41311400 | -5.32594900 | -0.96506100 |
| H    | -6.81974500 | -5.95573600 | -1.51667000 |
| C    | -5.20225200 | -4.79153100 | -1.32547500 |
| H    | -4.78308800 | -5.07682800 | -2.10445700 |
| C    | -8.34811400 | -5.57968400 | 0.65209300  |
| C    | -1.52211100 | -1.54664200 | -0.56851700 |
| Zn   | 0.53674600  | 0.04510600  | -0.58232400 |
| O    | 2.22677500  | -0.78894200 | -1.02146500 |
| N    | 0.71078000  | 1.90034100  | 0.36285200  |
| O    | 11.13468900 | -3.08475000 | -0.71697900 |
| O    | 2.38410400  | -0.81874900 | 1.18347400  |
| N    | 0.04721300  | 1.31615100  | -2.17418900 |
| O    | 11.35771200 | -2.83030000 | 1.46591000  |
| C    | 7.07166100  | -1.84881800 | -0.41872500 |
| C    | 5.11249400  | -1.51722400 | 0.99818000  |
| H    | 4.72836000  | -1.46770100 | 1.84408100  |
| C    | 8.45811700  | -2.18415400 | -0.53678700 |
| H    | 8.84440100  | -2.22940200 | -1.38212300 |

|   |             |             |             |
|---|-------------|-------------|-------------|
| C | 4.33687500  | -1.30966100 | -0.09395400 |
| C | 6.50350600  | -1.80865300 | 0.88372300  |
| C | 9.21854700  | -2.43671000 | 0.55389900  |
| C | 8.63835400  | -2.36308200 | 1.84225000  |
| H | 9.16832700  | -2.51732000 | 2.58975500  |
| C | 0.06204500  | 2.63131500  | -1.80334200 |
| C | 0.40588500  | 2.93776100  | -0.45272300 |
| C | 7.31962400  | -2.07174500 | 2.00797600  |
| H | 6.95498100  | -2.04483600 | 2.86353500  |
| C | 0.42411500  | 4.27311100  | -0.00777000 |
| C | 4.92319200  | -1.36840700 | -1.38451800 |
| H | 4.39062100  | -1.23728100 | -2.13662900 |
| C | 6.26340800  | -1.61644300 | -1.53890100 |
| H | 6.63754700  | -1.62909400 | -2.38962600 |
| C | 2.87962700  | -0.96626500 | 0.05980100  |
| C | -0.25003000 | 1.02288900  | -3.41854000 |
| H | -0.26694900 | 0.12808400  | -3.67202000 |
| C | -0.54567400 | 2.00601000  | -4.39199500 |
| H | -0.73973200 | 1.76696600  | -5.26908300 |
| C | 10.67856800 | -2.81507200 | 0.38850800  |
| C | -0.24252200 | 3.67706400  | -2.69882600 |
| C | 1.05823700  | 2.16885100  | 1.61568500  |
| H | 1.26745100  | 1.46172900  | 2.18160500  |
| C | 0.80299100  | 4.48665700  | 1.32518900  |
| H | 0.83315200  | 5.35302700  | 1.66397700  |
| C | -0.20595400 | 5.03389100  | -2.19220200 |
| H | -0.40312800 | 5.73452600  | -2.77122300 |
| C | -0.53716600 | 3.31824500  | -4.00921000 |
| H | -0.73169700 | 3.97845400  | -4.63323400 |
| C | 1.12089500  | 3.45784300  | 2.11119500  |
| H | 1.38395700  | 3.60731100  | 2.99053900  |
| C | 0.09845400  | 5.31134600  | -0.92568800 |
| H | 0.09909700  | 6.19609100  | -0.63656300 |
| O | -2.86953700 | 5.17353900  | 0.91672200  |
| C | -2.88959600 | 2.91621300  | 0.46507400  |
| C | -2.47213100 | 3.11264500  | 1.85792000  |
| C | -2.13113900 | 2.29914600  | 2.89819000  |
| H | -2.12446200 | 1.37543300  | 2.78771500  |
| C | -2.48562500 | 4.47071900  | 2.05998800  |
| C | -3.57459000 | 2.06628000  | -1.63410300 |
| H | -3.75262800 | 1.34438500  | -2.19270400 |
| C | -2.17835700 | 5.06626800  | 3.23461400  |
| H | -2.20975700 | 5.99146500  | 3.33563400  |
| C | -1.79579300 | 2.84954600  | 4.11079700  |
| H | -1.55527800 | 2.30093900  | 4.82230300  |
| C | -3.12730200 | 1.83328800  | -0.35360200 |
| H | -2.98839700 | 0.96516600  | -0.04861500 |
| C | -3.76232300 | 3.32618900  | -2.10241500 |
| H | -4.05361600 | 3.43940100  | -2.97823200 |
| C | -3.10793400 | 4.20007700  | -0.02666200 |
| C | -3.53829300 | 4.44494700  | -1.32756500 |
| H | -3.66520500 | 5.30682200  | -1.65346600 |
| C | -1.81827000 | 4.24410300  | 4.26895600  |
| H | -1.58488000 | 4.61448600  | 5.08998500  |
| H | 12.06679456 | -3.29932975 | -0.63490967 |
| H | -9.67752548 | -5.81010448 | 1.84483323  |

---

Total electronic Energy = -2699.052613 (Hartree/Particle).

**Table S10:** Geometry of **1-DBT (Dibenzothiophene)** (singlet) for single point calculation, directly obtained from single crystal X-ray Crystallographic structure, computed at the B3LYP-D3/ 6-311++G\*\* (HCNOS)/ LANL2DZ (Zn) level in the absence of any solvent.

| Atom | x           | y           | z           |
|------|-------------|-------------|-------------|
| Zn   | 0.68167900  | 0.06481800  | 0.58958600  |
| O    | -0.68903500 | 1.00821900  | -0.43605800 |
| O    | 2.48605400  | 0.66306300  | 1.00353400  |
| O    | -0.63018900 | 2.19328700  | 1.42329100  |
| N    | 0.52558200  | -1.93656600 | 0.01914000  |
| N    | -0.00841400 | -0.78822600 | 2.37276800  |
| O    | 2.62979600  | 0.33538900  | -1.17627000 |
| C    | -4.87152800 | 3.73911400  | -0.87066100 |
| C    | -2.96588600 | 3.55886600  | 0.65338500  |
| H    | -2.52042500 | 3.82979100  | 1.42360500  |
| C    | 0.09777300  | -2.74068400 | 1.03275900  |
| C    | -0.18788500 | -2.12788600 | 2.29145700  |
| C    | 7.33291900  | 1.57687400  | 0.31025600  |
| C    | -2.43135000 | 2.58176600  | -0.10588500 |
| C    | -3.09183400 | 2.15048600  | -1.26546100 |
| H    | -2.71974600 | 1.47205800  | -1.78008800 |
| C    | -4.27812200 | 2.71548500  | -1.64816700 |
| H    | -4.69837400 | 2.42478700  | -2.42497700 |
| C    | -0.08575100 | -4.12732800 | 0.87777400  |
| C    | -1.14975400 | 1.91497800  | 0.33709100  |
| C    | 5.34769000  | 1.13029100  | -1.08949300 |
| H    | 4.94931700  | 1.03596600  | -1.92497800 |
| C    | 3.13501500  | 0.62018700  | -0.10086000 |
| C    | 4.59821400  | 0.97034600  | 0.02930100  |
| C    | -0.62940700 | -2.88659600 | 3.36908300  |
| C    | 5.20591100  | 1.10318300  | 1.28922100  |
| H    | 4.68387300  | 0.99066300  | 2.05037800  |
| C    | 0.76982000  | -2.48878900 | -1.16695100 |
| H    | 1.05089900  | -1.94356400 | -1.86597300 |
| C    | 6.53909300  | 1.39164100  | 1.44038300  |
| H    | 6.90977400  | 1.46470800  | 2.29022000  |
| C    | -0.53010800 | -4.89530000 | 2.00716200  |
| H    | -0.63753100 | -5.81537500 | 1.92268700  |
| C    | -0.28525000 | -0.19530900 | 3.53392700  |
| H    | -0.17407500 | 0.72638500  | 3.60078900  |
| C    | 0.61547000  | -3.86532000 | -1.39852100 |
| H    | 0.80436300  | -4.22685400 | -2.23388500 |
| C    | -0.79137700 | -4.30021700 | 3.18643500  |
| H    | -1.08458600 | -4.81866200 | 3.90115700  |
| C    | -0.91885400 | -2.23817900 | 4.56773800  |
| H    | -1.23376000 | -2.71552900 | 5.30035500  |
| C    | 0.18896300  | -4.65764500 | -0.39024400 |
| H    | 0.07581600  | -5.56933500 | -0.53914100 |
| C    | -0.73143900 | -0.89383600 | 4.64651400  |
| H    | -0.90237400 | -0.44364200 | 5.44255900  |
| O    | -8.37814600 | 6.91559800  | -0.13218100 |
| O    | -8.43706300 | 5.73052100  | -1.99160000 |
| C    | -4.19565400 | 4.18470300  | 0.30242200  |
| C    | -6.10136600 | 4.36494100  | -1.22169400 |
| H    | -6.54675600 | 4.09402600  | -1.99184400 |
| C    | -6.63590200 | 5.34204200  | -0.46242400 |

|   |             |             |             |
|---|-------------|-------------|-------------|
| C | -5.97534700 | 5.77333100  | 0.69722200  |
| H | -6.34750600 | 6.45174900  | 1.21177900  |
| C | -4.78913000 | 5.20832200  | 1.07985800  |
| H | -4.36880700 | 5.49903000  | 1.85673800  |
| C | -7.91749800 | 6.00882900  | -0.90540000 |
| O | 11.59750400 | 2.36130000  | -1.69779400 |
| O | 11.45385300 | 2.68907700  | 0.48204800  |
| C | 6.75071000  | 1.44749900  | -1.00444600 |
| C | 8.73593900  | 1.89408200  | 0.39530300  |
| H | 9.13431200  | 1.98840700  | 1.23078800  |
| C | 10.94861400 | 2.40418500  | -0.59332900 |
| C | 9.48541500  | 2.05402700  | -0.72349100 |
| C | 8.87764700  | 1.92118000  | -1.98348100 |
| H | 9.39975600  | 2.03371000  | -2.74456800 |
| C | 7.54453600  | 1.63273200  | -2.13457200 |
| H | 7.17378400  | 1.55965500  | -2.98448000 |
| S | -3.46947500 | -5.40688500 | -0.35024000 |
| C | -2.99582800 | -2.86977900 | -0.81179500 |
| C | -2.67451400 | -3.55470300 | -2.04099200 |
| C | -2.88401000 | -4.93464800 | -1.92777300 |
| C | -3.43096900 | -3.75363900 | 0.16793700  |
| C | -2.90498100 | -1.51219400 | -0.51313000 |
| H | -2.60756600 | -0.91279300 | -1.15819700 |
| C | -2.19358500 | -3.06503500 | -3.25349700 |
| H | -2.05609000 | -2.15228800 | -3.36047200 |
| C | -3.77666100 | -3.29125600 | 1.43769300  |
| H | -4.05525100 | -3.88862000 | 2.09501200  |
| C | -2.62657300 | -5.79865500 | -2.99065600 |
| H | -2.78554300 | -6.71057600 | -2.91165600 |
| C | -3.25124700 | -1.06894900 | 0.72574100  |
| H | -3.18584700 | -0.16032200 | 0.91589000  |
| C | -2.13628100 | -5.26984500 | -4.15226800 |
| H | -1.94207400 | -5.83500700 | -4.86571600 |
| C | -3.70181900 | -1.93635800 | 1.71275200  |
| H | -3.94930200 | -1.61196400 | 2.54873500  |
| C | -1.92433800 | -3.91699400 | -4.28048300 |
| H | -1.59300300 | -3.57865200 | -5.08083200 |
| H | -9.18849691 | 7.27170852  | -0.50382292 |
| H | 12.51522058 | 2.59407347  | -1.53900914 |

-----

Total electronic Energy = -3022.092246 (Hartree/Particle).

**Table S11:** DFT-optimized geometry of **Fluorene** (singlet), computed at the B3LYP-D3/ 6-31+G\*\* level in the absence of any solvent.

| Atom | x           | y           | z           |
|------|-------------|-------------|-------------|
| H    | -0.00003700 | 2.48870100  | -0.88101300 |
| C    | 3.01638800  | -1.21395500 | -0.00014300 |
| C    | 3.46282200  | 0.11447800  | -0.00014300 |
| C    | 2.54533800  | 1.17427300  | -0.00008900 |
| C    | 1.18405400  | 0.88789400  | -0.00003700 |
| C    | 0.73420800  | -0.44945500 | -0.00003600 |
| C    | 1.64882600  | -1.50589900 | -0.00008800 |
| H    | 3.73971600  | -2.02428200 | -0.00018600 |

|   |             |             |             |
|---|-------------|-------------|-------------|
| H | 4.52838000  | 0.32477400  | -0.00018300 |
| H | 2.89702900  | 2.20285500  | -0.00009200 |
| H | 1.30662300  | -2.53698900 | -0.00008400 |
| C | 0.00000000  | 1.83364600  | 0.00002600  |
| H | 0.00003700  | 2.48867600  | 0.88108500  |
| C | -1.18405400 | 0.88789400  | 0.00006000  |
| C | -2.54533800 | 1.17427200  | 0.00011900  |
| C | -3.46282200 | 0.11447800  | 0.00014800  |
| C | -3.01638800 | -1.21395500 | 0.00010400  |
| C | -1.64882600 | -1.50589800 | 0.00004800  |
| C | -0.73420700 | -0.44945500 | 0.00002700  |
| H | -2.89702900 | 2.20285500  | 0.00014700  |
| H | -4.52838000 | 0.32477500  | 0.00020100  |
| H | -3.73971600 | -2.02428200 | 0.00011800  |
| H | -1.30662200 | -2.53698900 | 0.00001900  |

-----

Total electronic Energy = -501.471968 (Hartree/Particle).

**Table S12:** DFT-optimized geometry of mono cationic **Fluorene<sup>+</sup>** (doublet), computed at the UB3LYP-D3/ 6-31+G\*\* level in the absence of any solvent.

| Atom | x           | y           | z           |
|------|-------------|-------------|-------------|
| H    | -0.00003700 | 2.52041800  | -0.88099300 |
| C    | 2.97694800  | -1.24391200 | -0.00014000 |
| C    | 3.42758500  | 0.10239400  | -0.00013800 |
| C    | 2.53058100  | 1.18816100  | -0.00008700 |
| C    | 1.17654800  | 0.91954200  | -0.00003800 |
| C    | 0.71166000  | -0.44186900 | -0.00003800 |
| C    | 1.62649600  | -1.52842700 | -0.00009000 |
| H    | 3.70644800  | -2.04671800 | -0.00018000 |
| H    | 4.49575700  | 0.29790000  | -0.00017600 |
| H    | 2.90593800  | 2.20642100  | -0.00008800 |
| H    | 1.27001500  | -2.55304400 | -0.00009100 |
| C    | 0.00000000  | 1.86656500  | 0.00002400  |
| H    | 0.00003700  | 2.52039800  | 0.88105400  |
| C    | -1.17654800 | 0.91954200  | 0.00006100  |
| C    | -2.53058100 | 1.18816100  | 0.00012300  |
| C    | -3.42758500 | 0.10239400  | 0.00014600  |
| C    | -2.97694800 | -1.24391200 | 0.00010600  |
| C    | -1.62649600 | -1.52842700 | 0.00004500  |
| C    | -0.71166000 | -0.44186900 | 0.00002200  |
| H    | -2.90593800 | 2.20642100  | 0.00015400  |
| H    | -4.49575700 | 0.29790000  | 0.00019500  |
| H    | -3.70644800 | -2.04671800 | 0.00012400  |
| H    | -1.27001500 | -2.55304400 | 0.00001500  |

-----

Total electronic Energy = -501.193797 (Hartree/Particle).

**Table S13:** DFT-optimized geometry of **Carbazole** (singlet), computed at the B3LYP-D3/ 6-31+G\*\* level in the absence of any solvent.

| Atom | x           | y           | z           |
|------|-------------|-------------|-------------|
| C    | 3.04405900  | -1.15638100 | -0.00013900 |
| C    | 3.42990000  | 0.19802400  | -0.00013900 |
| C    | 2.48293700  | 1.22262400  | -0.00008800 |
| C    | 1.13388300  | 0.85761400  | -0.00003700 |
| C    | 0.72477100  | -0.50347300 | -0.00003600 |
| C    | 1.69600100  | -1.51249000 | -0.00008800 |
| H    | 3.80641700  | -1.92934800 | -0.00018000 |
| H    | 4.48574200  | 0.45238200  | -0.00017900 |
| H    | 2.78578100  | 2.26573400  | -0.00009100 |
| H    | 1.40128000  | -2.55799400 | -0.00008700 |
| C    | -1.13388300 | 0.85761400  | 0.00006000  |
| C    | -2.48293700 | 1.22262300  | 0.00012200  |
| C    | -3.42990000 | 0.19802400  | 0.00014500  |
| C    | -3.04405900 | -1.15638100 | 0.00011000  |
| C    | -1.69600100 | -1.51249000 | 0.00004800  |
| C    | -0.72477000 | -0.50347300 | 0.00002300  |
| H    | -2.78578100 | 2.26573400  | 0.00014800  |
| H    | -4.48574200 | 0.45238200  | 0.00019700  |
| H    | -3.80641700 | -1.92934800 | 0.00012900  |
| H    | -1.40128000 | -2.55799400 | 0.00001900  |
| N    | 0.00000000  | 1.65754600  | 0.00002100  |
| H    | 0.00000000  | 2.66462600  | 0.00002000  |

Total electronic Energy = -517.520771 (Hartree/Particle).

**Table S14:** DFT-optimized geometry of mono cationic **Carbazole<sup>+</sup>** (doublet), computed at the UB3LYP-D3/ 6-31+G\*\* level in the absence of any solvent.

| Atom | x           | y           | z           |
|------|-------------|-------------|-------------|
| C    | 3.06522500  | -1.12412400 | -0.00013200 |
| C    | 3.44297200  | 0.22729500  | -0.00012000 |
| C    | 2.47954900  | 1.23709800  | -0.00007600 |
| C    | 1.13473900  | 0.83316900  | -0.00004400 |
| C    | 0.73262000  | -0.53458100 | -0.00005600 |
| C    | 1.70415200  | -1.51792900 | -0.00010100 |
| H    | 3.83386000  | -1.89004100 | -0.00016100 |
| H    | 4.49476300  | 0.49070800  | -0.00014900 |
| H    | 2.75846700  | 2.28594300  | -0.00007300 |
| H    | 1.44251600  | -2.57088500 | -0.00010900 |
| C    | -1.13473900 | 0.83316900  | 0.00005800  |
| C    | -2.47954800 | 1.23709800  | 0.00013900  |
| C    | -3.44297200 | 0.22729500  | 0.00016500  |
| C    | -3.06522600 | -1.12412300 | 0.00012300  |
| C    | -1.70415300 | -1.51792900 | 0.00004000  |
| C    | -0.73262000 | -0.53458100 | 0.00000800  |
| H    | -2.75846500 | 2.28594300  | 0.00017000  |
| H    | -4.49476300 | 0.49070900  | 0.00021900  |
| H    | -3.83386100 | -1.89004000 | 0.00015000  |
| H    | -1.44251700 | -2.57088400 | 0.00000600  |
| N    | 0.00000100  | 1.61280000  | -0.00000800 |
| H    | 0.00000100  | 2.62780000  | -0.00002500 |

---

Total electronic Energy = -517.250234 (Hartree/Particle).

**Table S15:** DFT-optimized geometry of **Dibenzofuran** (singlet), computed at the B3LYP-D3/6-31+G\*\* level in the absence of any solvent.

---

| Atom | x           | y           | z           |
|------|-------------|-------------|-------------|
| C    | 3.05907000  | -1.11156600 | -0.00013400 |
| C    | 3.40260900  | 0.25269800  | -0.00014200 |
| C    | 2.42229500  | 1.24983000  | -0.00009600 |
| C    | 1.10116000  | 0.82320300  | -0.00004200 |
| C    | 0.72579500  | -0.53472900 | -0.00003400 |
| C    | 1.72339300  | -1.51694600 | -0.00008300 |
| H    | 3.84664300  | -1.85885500 | -0.00017300 |
| H    | 4.44980000  | 0.53958900  | -0.00018200 |
| H    | 2.67234900  | 2.30497300  | -0.00010200 |
| H    | 1.46332200  | -2.57118500 | -0.00007700 |
| C    | -1.10116000 | 0.82320300  | 0.00006200  |
| C    | -2.42229500 | 1.24983000  | 0.00012200  |
| C    | -3.40260900 | 0.25269800  | 0.00014000  |
| C    | -3.05907000 | -1.11156600 | 0.00011800  |
| C    | -1.72339300 | -1.51694600 | 0.00005300  |
| C    | -0.72579400 | -0.53472900 | 0.00002500  |
| H    | -2.67234900 | 2.30497300  | 0.00014300  |
| H    | -4.44980000 | 0.53958900  | 0.00019100  |
| H    | -3.84664300 | -1.85885500 | 0.00013600  |
| H    | -1.46332100 | -2.57118500 | 0.00002600  |
| O    | 0.00000000  | 1.65263400  | 0.00001300  |

---

Total electronic Energy = -537.374115 (Hartree)

**Table S16:** DFT-optimized geometry of mono cationic **Dibenzofuran<sup>+</sup>** (doublet), computed at the UB3LYP-D3/6-31+G\*\* level in the absence of any solvent.

---

| Atom | x           | y           | z           |
|------|-------------|-------------|-------------|
| C    | 3.02393200  | -1.14176200 | -0.00013300 |
| C    | 3.37061400  | 0.24155300  | -0.00012800 |
| C    | 2.40714000  | 1.26704100  | -0.00008100 |
| C    | 1.09432100  | 0.85542200  | -0.00003800 |
| C    | 0.70427600  | -0.52783300 | -0.00004000 |
| C    | 1.70537500  | -1.54042300 | -0.00008900 |
| H    | 3.81810300  | -1.88009800 | -0.00017100 |
| H    | 4.42136300  | 0.51497900  | -0.00016300 |
| H    | 2.68096600  | 2.31553400  | -0.00008600 |
| H    | 1.42980600  | -2.58936300 | -0.00008700 |
| C    | -1.09432100 | 0.85542200  | 0.00004800  |
| C    | -2.40713900 | 1.26704100  | 0.00011600  |
| C    | -3.37061400 | 0.24155300  | 0.00015600  |

---

|   |             |             |             |
|---|-------------|-------------|-------------|
| C | -3.02393300 | -1.14176200 | 0.00012100  |
| C | -1.70537500 | -1.54042300 | 0.00005700  |
| C | -0.70427700 | -0.52783300 | 0.00002000  |
| H | -2.68096500 | 2.31553400  | 0.00013300  |
| H | -4.42136300 | 0.51498000  | 0.00021000  |
| H | -3.81810400 | -1.88009700 | 0.00014700  |
| H | -1.42980600 | -2.58936200 | 0.00003600  |
| O | 0.00000000  | 1.67873900  | -0.00000900 |

-----

Total electronic Energy = -537.085272 (Hartree)

**Table S17:** DFT-optimized geometry of **Dibenzothiophene** (singlet), computed at the B3LYP-D3/ 6-31+G\*\* level in the absence of any solvent.

| Atom | x           | y           | z           |
|------|-------------|-------------|-------------|
| C    | -2.98361300 | -1.44712600 | 0.00013100  |
| C    | -3.49590700 | -0.13775100 | 0.00014300  |
| C    | -2.63940000 | 0.96188800  | 0.00010100  |
| C    | -1.25964700 | 0.73363200  | 0.00004600  |
| C    | -0.72707800 | -0.57620900 | 0.00003400  |
| C    | -1.60955500 | -1.66839000 | 0.00007700  |
| H    | -3.66643900 | -2.29131300 | 0.00016400  |
| H    | -4.57020100 | 0.02087900  | 0.00018700  |
| H    | -3.03494900 | 1.97288300  | 0.00010800  |
| H    | -1.21805000 | -2.68147400 | 0.00006900  |
| C    | 1.25964700  | 0.73363200  | -0.00005600 |
| C    | 2.63940000  | 0.96188900  | -0.00011400 |
| C    | 3.49590700  | -0.13775000 | -0.00014200 |
| C    | 2.98361400  | -1.44712500 | -0.00011300 |
| C    | 1.60955500  | -1.66839000 | -0.00005500 |
| C    | 0.72707800  | -0.57620900 | -0.00002500 |
| H    | 3.03494900  | 1.97288300  | -0.00013700 |
| H    | 4.57020100  | 0.02088000  | -0.00018500 |
| H    | 3.66644000  | -2.29131200 | -0.00013900 |
| H    | 1.21805200  | -2.68147400 | -0.00003400 |
| S    | -0.00000100 | 1.97284300  | -0.00001300 |

-----

Total electronic Energy = -860.352241 (Hartree)

**Table S18:** DFT-optimized geometry of mono cationic **Dibenzothiophene<sup>+</sup>** (doublet), computed at the UB3LYP-D3/ 6-31+G\*\* level in the absence of any solvent.

| Atom | x           | y           | z          |
|------|-------------|-------------|------------|
| C    | -3.01110300 | -1.41067600 | 0.00013400 |
| C    | -3.51260700 | -0.10251400 | 0.00014400 |
| C    | -2.63887800 | 0.98452300  | 0.00009900 |
| C    | -1.25712400 | 0.71787400  | 0.00004400 |



|   |             |             |             |
|---|-------------|-------------|-------------|
| C | -0.73224500 | -0.60265200 | 0.00003400  |
| C | -1.62289800 | -1.66735200 | 0.00007800  |
| H | -3.70159400 | -2.24788000 | 0.00017100  |
| H | -4.58357800 | 0.06780200  | 0.00018700  |
| H | -3.01266000 | 2.00329700  | 0.00010300  |
| H | -1.26390100 | -2.69146400 | 0.00007100  |
| C | 1.25712400  | 0.71787400  | -0.00005400 |
| C | 2.63887600  | 0.98452400  | -0.00011300 |
| C | 3.51260700  | -0.10251200 | -0.00014300 |
| C | 3.01110500  | -1.41067400 | -0.00011300 |
| C | 1.62290000  | -1.66735100 | -0.00005500 |
| C | 0.73224700  | -0.60265100 | -0.00002500 |
| H | 3.01265800  | 2.00329900  | -0.00013500 |
| H | 4.58357900  | 0.06780600  | -0.00018900 |
| H | 3.70159700  | -2.24787700 | -0.00013700 |
| H | 1.26390400  | -2.69146300 | -0.00003700 |
| S | -0.00000200 | 1.91912400  | -0.00001300 |

---

Total electronic Energy = -860.069632 (Hartree)

## References

1. Frisch, M. J.; Trucks, G. W.; Schlegel, H. B.; Scuseria, G. E.; Robb, M. A.; Cheeseman, J. R.; Scalmani, G.; Barone, V.; Petersson, G. A.; Nakatsuji, H.; Li, X.; Caricato, M.; Marenich, A. V.; Bloino, J.; Janesko, B. G.; Gomperts, R.; Mennucci, B.; Hratchian, H. P.; Ortiz, J. V.; Izmaylov, A. F.; Sonnenberg, J. L.; Williams-Young, D.; Ding, F.; Lipparini, F.; Egidi, F.; Goings, J.; Peng, B.; Petrone, A.; Henderson, T.; Ranasinghe, D.; Zakrzewski, V. G.; Gao, J.; Rega, N.; Zheng, G.; Liang, W.; Hada, M.; Ehara, M.; Toyota, K.; Fukuda, R.; Hasegawa, J.; Ishida, M.; Nakajima, T.; Honda, Y.; Kitao, O.; Nakai, H.; Vreven, T.; Throssell, K.; Montgomery, J. A., Jr.; Peralta, J. E.; Ogliaro, F.; Bearpark, M. J.; Heyd, J. J.; Brothers, E. N.; Kudin, K. N.; Staroverov, V. N.; Keith, T. A.; Kobayashi, R.; Normand, J.; Raghavachari, K.; Rendell, A. P.; Burant, J. C.; Iyengar, S. S.; Tomasi, J.; Cossi, M.; Millam, J. M.; Klene, M.; Adamo, C.; Cammi, R.; Ochterski, J. W.; Martin, R. L.; Morokuma, K.; Farkas, O.; Foresman, J. B.; Fox, D. J. *Gaussian 16, Revision A.03, Gaussian, Inc., Wallingford CT, 2016.*
2. Lee, C.; Yang, W.; Parr, R. G. *Phys. Rev. B* **1988**, *37*, 785-789.
3. Becke, A. D. *J. Chem. Phys.* **1993**, *98*, 1372.
4. Miehlich, B.; Savin, A.; Stoll, H.; Preuss, H. *Chem. Phys. Lett.* **1989**, *157*, 200-206.
5. Ditchfield, R.; Hehre, W. J.; Pople, J. A. *J. Chem. Phys.* **1971**, *54*, 724.
6. Hehre, W. J.; Ditchfield, R.; Pople, J. A. *J. Chem. Phys.* **1972**, *56*, 2257.
7. Hariharan, P. C.; Pople, J. A. *Theor. Chem. Acc.* **1973**, *28*, 213-222.
8. Hay, P. J.; Wadt, W. R. *J. Chem. Phys.* **1985**, *82*, 270.
9. Wadt, W. R.; Hay, P. J. *J. Chem. Phys.* **1985**, *82*, 284.
10. Hay, P. J.; Wadt, W. R. *J. Chem. Phys.* **1985**, *82*, 299.
11. Grimme, S. *J. Comput. Chem.* **2004**, *25*, 1463-1476.
12. Grimme, S. *J. Comput. Chem.* **2006**, *27*, 1787-1799.
13. Grimme, S.; Antony, J.; Ehrlich, S.; Krieg, H. *J. Chem. Phys.* **2010**, *132*, 154104 (1-19).
14. Dennington, R.; Keith, T. A.; Millam, J. M. *GaussView, Version 6.0.16, Semichem Inc., Shawnee Mission, KS 2016.*
